# Supplementary material for: Optimization of Influential Nutrients during Direct Cellulose Fermentation into Hydrogen by Clostridium thermocellum
Source: MDPI journal article supplement (doi:10.3390/ijms16023116), 2015-01-30
Supplement: s1 [file s1]

## Supplementary Information

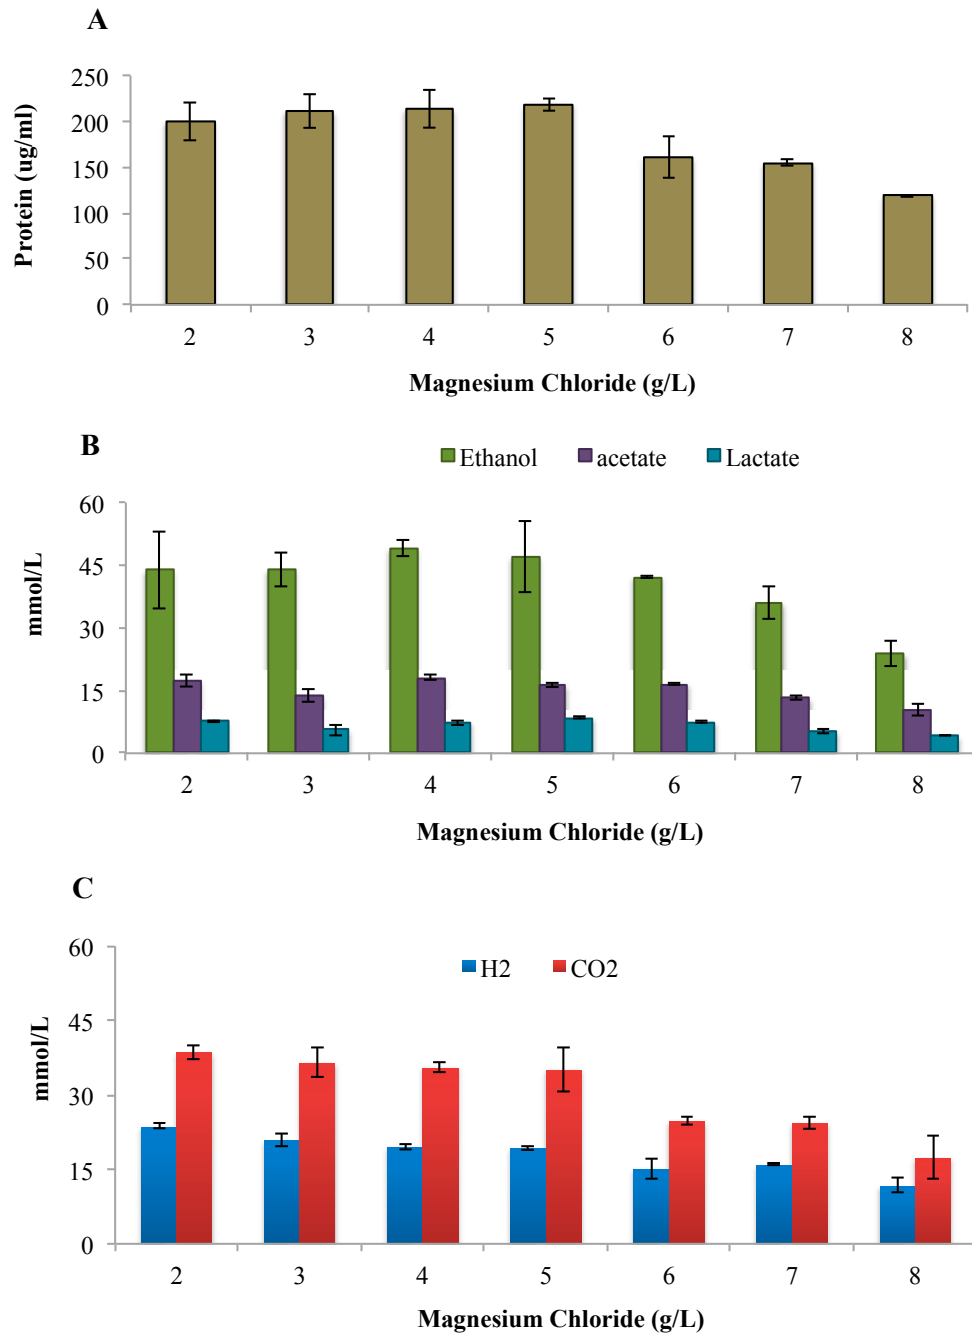

**Figure S1.** Effect of increased levels of  $\text{MgCl}_2$  on ethanol production was examined by supplementing (up to 6 g/L)  $\text{MgCl}_2 \cdot 6\text{H}_2\text{O}$  to the OptE (optimum composition for ethanol) composition. In terms of growth or production, cultures with supplemented  $\text{MgCl}_2$  showed no significant improvement over OptE. Moreover, decreased growth (A) and production (B,C) were observed as the concentration of  $\text{Mg}^{2+}$  exceeded 29.51 mM (at 6 g/L  $\text{MgCl}_2 \cdot 6\text{H}_2\text{O}$ ).
